# Supplementary material for: Deterministic HOX Patterning in Human Pluripotent Stem Cell-Derived Neuroectoderm
Source: PubMed Central journal article supplement — Stem Cell Reports. 2015 Apr 2;4(4):632–44. doi: 10.1016/j.stemcr.2015.02.018 (PMC4400649; doi:10.1016/j.stemcr.2015.02.018), 2015-04-02
Supplement: mmc1.pdf [file mmc1.pdf]

Stem Cell Reports, Volume 4

Supplemental Information

**Deterministic *HOX* Patterning in Human  
Pluripotent Stem Cell-Derived Neuroectoderm**

Ethan S. Lippmann, Clay E. Williams, David A. Ruhl, Maria C. Estevez-Silva, Edwin R. Chapman, Joshua J. Coon, and Randolph S. Ashton

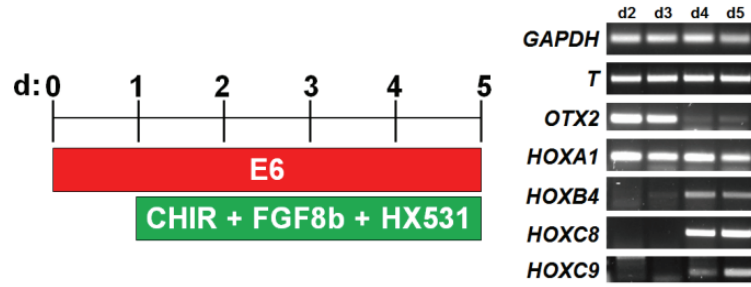

**Figure S1. Inhibition of RA signaling by 1  $\mu$ M HX531 does not disrupt *HOX* progression, related to Figure 1.** RT-PCR data indicates that CHIR/FGF8b effects are not indirectly mediated by endogenous RA signaling.

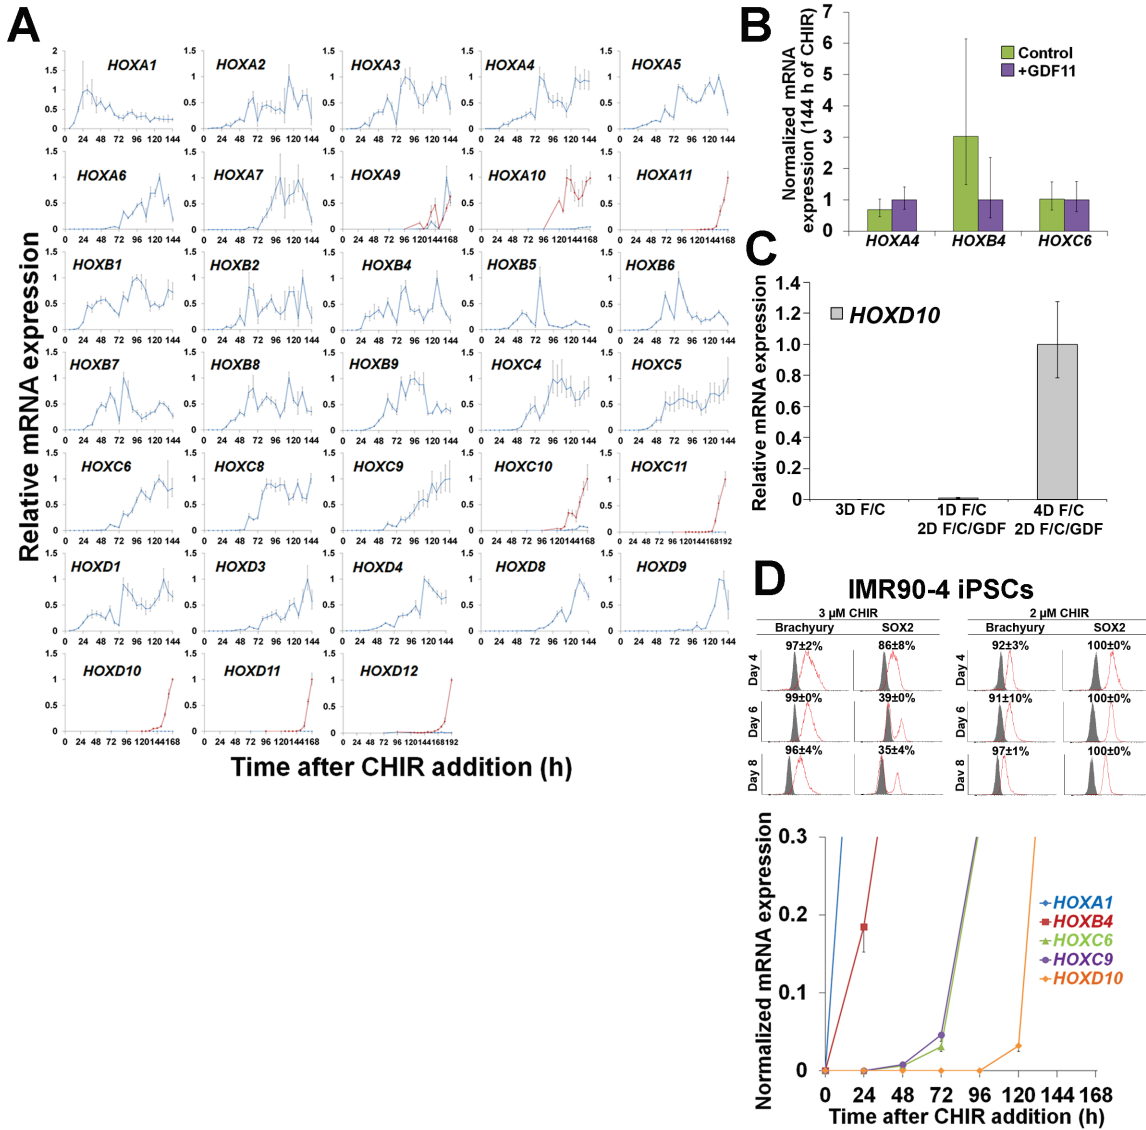

**Figure S2. *HOX* regulation in the neuromesodermal state, related to Figure 2. (A)** qPCR analysis of *HOX* expression during neuromesodermal propagation in H9 hESCs. Experimental timing is found in Figure 2B. Data are presented as mean  $\pm$  S.D. from technical duplicates normalized to maximum expression for each gene. Blue lines = samples not receiving GDF11; red lines = samples receiving GDF11 according to Figure 2B. *HOXC11* and *HOXD12* required 192 h of CHIR treatment to be appreciably detected. **(B)** Rostral *HOX* expression is unaffected by GDF11 treatment during H9 hESC neuromesodermal propagation. qPCR data are presented as mean  $\pm$  S.D. from technical duplicates normalized to the GDF11-treated sample for each

gene. **(C)** Premature treatment with GDF11 during neuromesodermal propagation does not effectively induce *HOXD10*. qPCR data are presented as mean  $\pm$  S.D. from technical duplicates normalized to the condition of maximum *HOXD10* expression. **(D)** Evaluation of neuromesodermal propagation and *HOX* expression in IMR90-4 iPSCs. Differentiation was conducted according to Figure 2B. The neuromesodermal phenotype was assessed during differentiation in 2 or 3  $\mu$ M CHIR. Grey histograms, IgG control. Red histograms, label of interest. Whereas 2  $\mu$ M CHIR maintained the neuromesodermal state, 3  $\mu$ M CHIR resulted in a mesodermal shift exemplified by a reduction in SOX2 expression. Data were collected by flow cytometry and presented as mean  $\pm$  S.D. from biological duplicates. During neuromesodermal propagation, progressive *HOX* activation was also verified by qPCR. Data are presented as mean  $\pm$  S.D. from technical duplicates normalized to maximum expression for each gene.

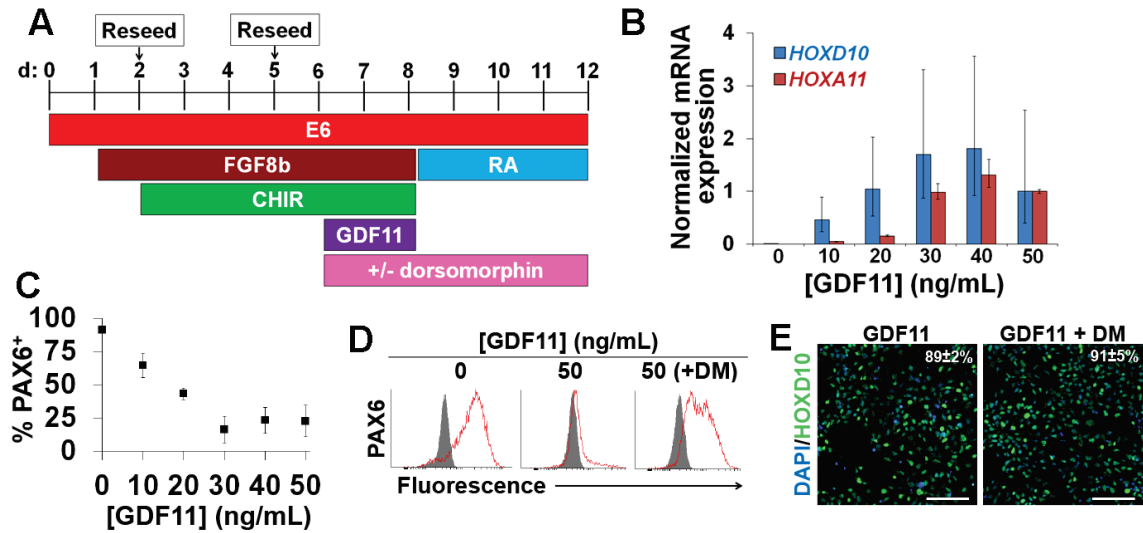

**Figure S3. Dorsomorphin is required during GDF11 treatment to achieve Pax6 expression after RA treatment, related to Figure 3. (A)** Timeline of differentiation. All analyses were conducted at day 12. **(B)** qPCR assessment of lumbosacral gene expression. Data are presented as mean  $\pm$  S.D. from technical duplicates normalized to the maximum GDF11 dose. **(C)** Expression of PAX6 in response to increased GDF11 concentrations. Data were collected by flow cytometry and presented as mean  $\pm$  S.D. from biological duplicates. SOX2 was uniformly expressed regardless of GDF11 treatment (data not shown). **(D)** Flow cytometry histograms demonstrating that the addition of dorsomorphin (DM) is sufficient to recover PAX6 expression ( $83 \pm 4\%$  PAX6<sup>+</sup>). Grey histograms, IgG control; Red histograms, PAX6. **(E)** Immunocytochemistry at day 12 indicates dorsomorphin does not affect the acquisition of HOXD10. Percentages are listed as mean  $\pm$  S.D. calculated from 2 fields per sample (technical replicates, minimum 2000 cells counted). Scale bars, 100  $\mu$ m.

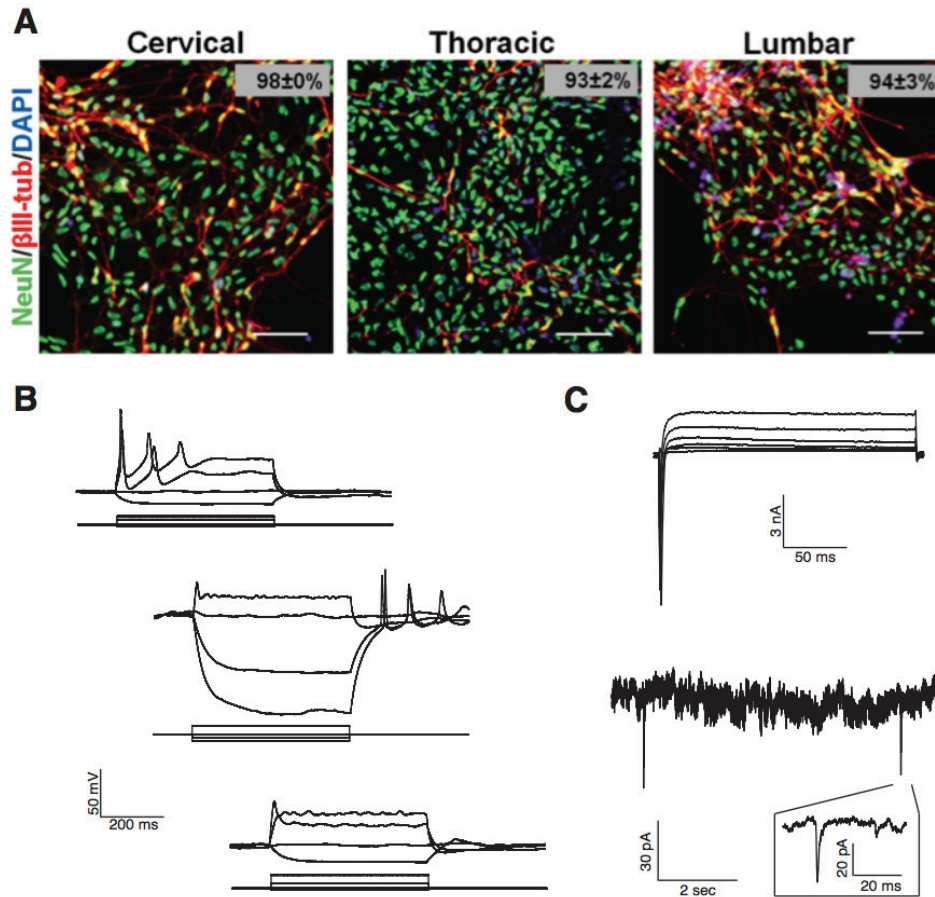

**Figure S4. NeuN quantification and electrophysiology after neuronal maturation, related to Figure 4. (A)** Samples were differentiated according to Figure 4C. Scale bars, 100  $\mu$ m. Percentages are mean  $\pm$  S.D. calculated from 2-4 fields per sample (technical replicates, minimum 1000 cells counted). **(B)** Samples were differentiated for >2 months prior to current clamp characterization of membrane properties (see Experimental Procedures for details). Examples of the three classes of action potentials (APs) were observed. Top: Mature APs (observed in 4/18 cells). Middle: Rebound APs triggered at offset of hyperpolarization (observed in 4/18 cells). Bottom: “Abortive” AP indicative of an immature neuron ((Belinsky et al., 2014); observed in 7/18 cells). APs were observed across all conditions (cervical, thoracic, lumbar), with no noticeable difference in basic membrane properties. Resting membrane potentials: -

31±3.9mV. Input resistance: 1±1.6 GΩ. Specific capacitance: 14.38±1.8pF. **(C)** Voltage clamp characterization of ionic and synaptic currents. Examples of whole-cell currents in response to incrementing 500ms voltage steps (top). Spontaneous quantal synaptic currents (bottom) were observed in 6/11 cells tested across all conditions.

**Table S1.** Proteins identified at a 1% FDR and TMT quantitation values. This information is located in the attached spreadsheet.



**Table S2.** Primary antibody list.

| <b>Antigen</b>      | <b>Host species</b> | <b>Clone or product #</b> | <b>Dilution</b>            | <b>Vendor</b>  |
|---------------------|---------------------|---------------------------|----------------------------|----------------|
| SOX2                | Mouse               | 10H9.1                    | 1:1000 (FC)<br>1:500 (ICC) | Millipore      |
| Brachyury           | Goat                | AF2085                    | 1:200 (FC)<br>1:500 (ICC)  | R&D Systems    |
| PAX6                | Mouse               | N/A                       | 1:200 (FC)                 | DSHB           |
| HOXB1               | Sheep               | AF6318                    | 1:100 (ICC)                | R&D Systems    |
| HOXB4               | Rat                 | I12                       | 1:50 (ICC)                 | DSHB           |
| PAX6                | Rabbit              | PRB-278P                  | 1:500 (ICC)                | Covance        |
| N-cadherin          | Mouse               | 32                        | 1:500 (ICC)                | BD Biosciences |
| OTX2                | Goat                | AF1979                    | 1:500 (ICC)                | R&D Systems    |
| HOXD10              | Goat                | N/A                       | 1:500 (ICC)                | R&D Systems    |
| $\beta$ III-tubulin | Rabbit              | PRB-435P                  | 1:1000 (ICC)               | Covance        |
| NF-H                | Mouse               | SMI-32R                   | 1:1000 (ICC)               | Covance        |
| Synapsin            | Rabbit              | AB1543                    | 1:250 (ICC)                | Millipore      |
| NeuN                | Mouse               | A60                       | 1:100 (ICC)                | Millipore      |
| HB9                 | Mouse               | 81.5C10                   | 1:50 (ICC)                 | DSHB           |
| ISL1                | Mouse               | 39.4D5                    | 1:100 (ICC)                | DSHB           |
| ISL1                | Goat                | AF1837                    | 1:500 (ICC)                | R&D Systems    |
| FOXP1               | Rabbit              | ab16645                   | 1:20,000 (ICC)             | Abcam          |

**Table S3.** Primer sequences used for RT-PCR.

| <b>Gene</b>  | <b>Primer sequence</b>                                |
|--------------|-------------------------------------------------------|
| <i>GAPDH</i> | F: CACCGTCAAGGCTGAGAACG<br>R: GCCCCACTTGATTTTGGAGG    |
| <i>SOX2</i>  | F: TGGACAGTTACGCGCACAT<br>R: CGAGTAGGACATGCTGTAGGT    |
| <i>T</i>     | F: CTTCCCTGAGACCCAGTTCA<br>R: CAGGGTTGGGTACCTGTAC     |
| <i>OTX2</i>  | F: CCAGACATCTTCATGCGAGAG<br>R: GGCAGGTCTCACTTTGTTTTG  |
| <i>HOXA1</i> | F: AAATCAGGAAGCAGACCCAC<br>R: GTAGCCGTACTCTCCAACCTTC  |
| <i>HOXB4</i> | F: TACCCCTGGATGCGCAAAGTTC<br>R: TGGTGTGGGCAACTTGTGG   |
| <i>HOXC5</i> | F: ACAGATTTACCCGTGGATGAC<br>R: AGTGAGGTAGCGGTTAAAGTG  |
| <i>HOXC6</i> | F: GAATGAGGGAAGACGAGAAAGAG<br>R: CATAGGCGGTGGAATTGAGG |
| <i>HOXC8</i> | F: TTTATGGGGCTCAGCAAGAGG<br>R: TCCAATTCATCCTTCGGTTCTG |
| <i>HOXC9</i> | F: AGCACAAAGAGGAGAAGGC<br>R: CGTCTGGTACTTGGTGTAGG     |

**Table S4.** Taqman primers used for qPCR.

| <b>Gene</b>   | <b>Life Technologies Assay ID</b> |
|---------------|-----------------------------------|
| <i>RPS18</i>  | Hs01375212_g1                     |
| <i>CTNNB1</i> | Hs00355049_m1                     |
| <i>HOXA1</i>  | Hs00939046_m1                     |
| <i>HOXA2</i>  | Hs00534579_m1                     |
| <i>HOXA3</i>  | Hs00601076_m1                     |
| <i>HOXA4</i>  | Hs01573270_m1                     |
| <i>HOXA5</i>  | Hs00430330_m1                     |
| <i>HOXA6</i>  | Hs00430615_m1                     |
| <i>HOXA7</i>  | Hs00600844_m1                     |
| <i>HOXA9</i>  | Hs00266821_m1                     |
| <i>HOXA10</i> | Hs00172012_m1                     |
| <i>HOXA11</i> | Hs00194149_m1                     |
| <i>HOXB1</i>  | Hs00157973_m1                     |
| <i>HOXB2</i>  | Hs00609873_g1                     |
| <i>HOXB4</i>  | Hs00256884_m1                     |
| <i>HOXB5</i>  | Hs00357820_m1                     |
| <i>HOXB6</i>  | Hs00980016_m1                     |
| <i>HOXB7</i>  | Hs00270131_m1                     |
| <i>HOXB8</i>  | Hs00256885_m1                     |
| <i>HOXB9</i>  | Hs00256886_m1                     |
| <i>HOXC4</i>  | Hs00205994_m1                     |
| <i>HOXC5</i>  | Hs00232747_m1                     |
| <i>HOXC6</i>  | Hs00171690_m1                     |
| <i>HOXC8</i>  | Hs00224073_m1                     |
| <i>HOXC9</i>  | Hs00396786_m1                     |
| <i>HOXC10</i> | Hs00213579_m1                     |
| <i>HOXC11</i> | Hs00204415_m1                     |
| <i>HOXC12</i> | Hs00545229_m1                     |
| <i>HOXD1</i>  | Hs00707081_s1                     |
| <i>HOXD3</i>  | Hs00232506_m1                     |
| <i>HOXD4</i>  | Hs00429605_m1                     |
| <i>HOXD8</i>  | Hs00251905_m1                     |
| <i>HOXD9</i>  | Hs00610725_g1                     |
| <i>HOXD10</i> | Hs00157974_m1                     |
| <i>HOXD11</i> | Hs00360798_m1                     |
| <i>HOXD12</i> | Hs00706957_s1                     |

## Supplemental Experimental Procedures

### Mass spectrometry

Pelleted cells were lysed in 8 M urea, 50 mM Tris (pH 8.0), 50 mM sodium chloride, and protease inhibitor (Roche) by glass bead milling (Retsch) for 40 min (8 cycles of 4 min shaking, 1 min resting). The lysate was centrifuged at 10,000 x g for 5 min to remove cell debris. Protein content was measured using a BCA assay (Thermo Pierce). Disulfide bonds were reduced and alkylated using 5 mM dithiothreitol and 10 mM iodoacetamide. The alkylating reaction was then quenched with 5 mM dithiothreitol. Samples were diluted to 1.5 M urea and digested with trypsin (Promega) overnight at a 1:100 enzyme to protein ratio. Peptides were then desalted using tC18 solid-phase extraction columns (SepPak, Waters) and dried under vacuum.

Peptides were labeled with TMT 10plex isobaric labeling reagents (Thermo Scientific). Briefly, 0.8 mg of reagent was re-suspended in 50  $\mu$ L acetonitrile and added to 200  $\mu$ g peptides re-suspended in 100  $\mu$ L of 200mM TEAB, and shaken for 2 h. To ensure each sample contributed the same amount of protein, aliquots of each sample were mixed at a 1:1:1:1:1:1:1:1:1 ratio (9plex) according to BCA assay results and reporter ions from this mixture were used to inform the subsequent mixture ratio. Labeling reactions were then quenched with hydroxylamine. Samples were mixed according to reporter ion ratios, desalted, and dried under vacuum.

Peptides were re-suspended in reverse phase buffer A (20 mM ammonium formate; pH10). Buffer B contained 20 mM ammonium formate in 80% acetonitrile at pH 10. Separations were performed using a Surveyor liquid chromatography pump (Thermo Scientific) with a Gemini C18 column (250 mm x 4.60 mm; Phenomenex). Peptides were eluted using the following gradient: 0-4 min, 100% buffer A, 4-8 minutes 2-16% buffer B, 8-12 minutes 16-30% buffer B, 12-32 minutes 30%-55% buffer B, all at a flow rate of 0.8 mL min<sup>-1</sup>. Samples were collected from 10 to 40 min. Finally, the column was held at 100% buffer B for 10 min and then

re-equilibrated. Fractions were dried under vacuum and re-suspended in 0.2% formic acid for mass spectrometry analysis.

LC-MS was performed on a Thermo Orbitrap Fusion coupled to a nanoAcquity UPLC (Waters). Mobile phase A comprised water, 0.2% formic acid, and 5% DMSO and mobile phase B comprised acetonitrile, 0.2% formic acid, and 5% DMSO. Peptides were separated on a 75  $\mu\text{m}$  inner diameter fused silica capillary packed with 1.7  $\mu\text{m}$  diameter, 130 Å pore size Bridged Ethylene Hybrid C18 particles (Waters) heated to 60 °C. Samples were loaded onto the column for 12 min at 0.35  $\mu\text{l}/\text{min}$ . Mobile phase B increased to 4% at 0.1 min, 12% at 32 min, 22% at 60 min, and 30% at 70 min. The column was then washed for 5 minutes at 70% B and re-equilibrated for 20 min at 0% B. Eluting peptides were converted to gas phase ions by electrospray ionization.

The mass spectrometer instrument method consisted of isolation at 0.7 Th with the quadrupole, HCD fragmentation with normalized collision energy of 37, and analysis with the orbitrap at 60K resolution at 200  $m/z$ . Automatic Gain Control targets were set at  $10^5$  with max injection time of 60 ms. Precursors with a charge state of 2-8 could be sampled for MS (Nesvizhskii and Aebersold, 2005). Monoisotopic precursor selection was enabled. Dynamic exclusion was set to 30 s with a 10 ppm tolerance around the precursor.

Raw data were analyzed using Coon OMSSA Proteomic Analysis Software Suite (COMPASS) (Wenger et al., 2011). Briefly, DTA files were generated by extracting peak information from .Raw files. Spectra were searched against Uniprot human reference proteome using Open Mass Spectrometry Search Algorithm. Search parameters include a 75 ppm precursor mass tolerance, 0.03 da product ion tolerance, and up to three missed cleavages. Carbamidomethylation of cysteines and TMT modification of lysines and the N terminus were set as fixed modifications while oxidation of methionines was set as a variable modification. Peptides and proteins were filtered to a 1% FDR. Peptide and protein quantification was performed using TagQuant as described previously. Briefly, extracted reporter ion intensities

were purity corrected and normalized such that the total signal from each channel is equal. A list of all detected proteins is provided in Table S1.

### **Flow cytometry**

Flow cytometry was conducted as previously described (Lippmann et al., 2014). Primary antibodies are listed in Table S2. Samples were run on a FACSCalibur (BD Biosciences) and data were analyzed using Cyflogic software. Positive events were quantified by gating above the top 1% of species-matched IgG controls.

### **Immunocytochemistry**

Immunocytochemistry was conducted as previously described (Lippmann et al., 2014). Primary antibodies are listed in Table S2. Samples were visualized on a Nikon Ti-E epifluorescence microscope or a Nikon A1R confocal microscope. For HOXD10<sup>+</sup> cells in Figure 3D and Figure S3E, positive labeling was quantified relative to DAPI nuclear stain by manual counting using ImageJ software. For FOXP1<sup>+</sup> motor neurons in Figure 4B, images were quantified by manually counting the number of ISL1<sup>+</sup> or HB9<sup>+</sup> cells that co-expressed FOXP1 per field using ImageJ. For HOXB1 and HOXB4 in Figure 3C, positive labeling was quantified relative to DAPI using CellProfiler software (Carpenter et al., 2006). HOXB1 and HOXB4 expression were quantified within HB9<sup>+</sup> motor neurons in Figure 4A by manual counting using ImageJ software.

### **RT-PCR and qPCR**

Total RNA was extracted from cultured cells using Trizol (Life Technologies) according to the manufacturer's instructions. DNase (Roche) was used to eliminate genomic DNA during the isolation process. After isolation, 1-5 µg of total RNA was immediately subjected to reverse transcription using the Thermoscript RT-PCR kit (Life Technologies) in a 20 µL reaction according to the manufacturer's instructions. Resultant cDNA was diluted and utilized for RT-PCR (conducted as previously described (Lippmann et al., 2014); see Table S3 for primer sequences) or qPCR on a BioRad CFX96 detection unit using Taqman Gene Expression

Master Mix (Life Technologies) and Taqman primers (Life Technologies; see Table S4 for primer list).  $\Delta\Delta C_t$  values for each gene were calculated relative to *RPS18* and converted to fold difference assuming 100% primer efficiency.

### **Electrophysiology**

Cells were moved to a recording chamber perfused with a bath solution containing 128 mM NaCl, 5 mM KCl, 25 mM HEPES, 30 mM D-glucose, 1 mM  $MgCl_2$  and 2 mM  $Ca^{2+}$  (pH 7.4, adjusted to 300-310 mOsm with D-glucose). Borosilicate glass pipettes were pulled to a resistance of 4-6 M $\Omega$  and filled with an intracellular solution (pH 7.4) containing 130 mM K-gluconate, 10 mM HEPES, 5 mM Na-phosphocreatine, 2 mM Mg-ATP, 1 mM EGTA, and 0.3 mM Na-GTP. All experiments were conducted at room temperature. Whole-cell patch-clamp recordings were made with an Axon MultiClamp 700b amplifier (Molecular Devices). Target cells were identified visually by their neuron-like morphology. Typical seal resistances after achieving the patch were 15M $\Omega$ , neurons showing large (+10%) fluctuations in seal quality over the course of an experiment were excluded from the analysis. Measurements of resting membrane potentials (RMPs) were made immediately after achieving whole-cell mode. Liquid junction potentials were not corrected. To measure action potentials, membrane voltage was monitored in response to 500ms current injections, beginning at -100pA, and increasing in 10pA increments to 500pA (or when the membrane response to successive injections began to clearly plateau). Rapidly depolarizing spikes crossing 0mV were considered APs. Cells were held in voltage clamp at -60mV for measurement of spontaneous synaptic activity. To measure whole-cell currents, cells were held at -60mV and current responses were measured following 500ms voltage steps incrementing from -110mV to 110mV in 10mV steps.

## Supplemental References

Belinsky, G.S., Rich, M.T., Sirois, C.L., Short, S.M., Pedrosa, E., Lachman, H.M., and Antic, S.D. (2014). Patch-Clamp Recordings and Calcium Imaging Followed by Single-Cell PCR Reveal the Developmental Profile of 13 Genes in iPSC-Derived Human Neurons. *Stem Cell Res.* 12, 101–118.

Carpenter, A.E., Jones, T.R., Lamprecht, M.R., Clarke, C., Kang, I.H., Friman, O., Guertin, D.A., Chang, J.H., Lindquist, R.A., Moffat, J., et al. (2006). CellProfiler: image analysis software for identifying and quantifying cell phenotypes. *Genome Biol.* 7, R100.

Lippmann, E.S., Estevez-Silva, M.C., and Ashton, R.S. (2014). Defined Human Pluripotent Stem Cell Culture Enables Highly Efficient Neuroepithelium Derivation Without Small Molecule Inhibitors. *Stem Cells* 32, 1032–1042.

Nesvizhskii, A.I., and Aebersold, R. (2005). Interpretation of Shotgun Proteomic Data The Protein Inference Problem. *Mol. Cell. Proteomics* 4, 1419–1440.

Wenger, C.D., Phanstiel, D.H., Lee, M.V., Bailey, D.J., and Coon, J.J. (2011). COMPASS: A suite of pre- and post-search proteomics software tools for OMSSA. *PROTEOMICS* 11, 1064–1074.
